# Supplementary material
Source: Research Square preprint supplement (doi:10.21203/rs.3.rs-8966968/v1)
Supplement: Supplementary file 1 [file 95563af023cea67e565302be.docx]

**Characterizing the local rice varieties of West Garo Hills district of Meghalaya: Preserving traditional ecological knowledge to address crop diversity, improved agricultural practices, and nutritional security**

**Supplementary Table 1. Summary of the methodologies used for food nutrient analysis**

| **Test Parameter** | **Methodology** | **Reference Method** | **Limit Of Quantification** |
| --- | --- | --- | --- |
| Energy (Kcal/100g) | By Conversion Factors Calculation | CODEX Guideline/WHO Guideline for nutritional labelling | 4 Kcal |
| Protein (g/100g) | Kjeldahl Nitrogen Trimetric Method | Based on IS 7219 | 0.1% |
| Carbohydrates (g/100g) | By Differential Calculation of proximate Analysis | Based on IS - 1656 | 1% |
| Total Fat (g/ 100g) | By Soxhlet Instrument/Acid Hydrolysis Method (Solvent Extraction) | Based on IS-4684 (Rice), IS-15271 (dry leaf), AOAC 922.06 (GLV, Fruits, Other Vegetables) | 0.1% |
| Dietary fiber (g/100g) | Enzymatic–Gravimetric method | Based on AOAC 985.29 | 0.5% |
| Vit B1 (mcg/100g) | Liquid Chromatography-Mass Spectrometry (LCMS/MS) | Agilent Technology | 100 PPB (parts per billion) |
| Vit B2 (mcg/100g) | LCMS/MS | Agilent Technology | 100 PPB |
| Vit B3 (mcg/100g) | LCMS/MS | Agilent Technology | 100 PPB |
| Vit B6 (mcg/100g) | LCMS/MS | Agilent Technology | 100 PPB |
| Iron (mg/100g) | Inductively Coupled Plasma-Optical Emission Spectrometry (ICP-OES) | Based on AOAC 22nd Edt. 2023 | 0.01 mg/100 g |
| Zinc (mg/ 100g) | (ICP-OES) | Based on AOAC 22nd Edt. 2023 | 0.02 mg/100 g |
| Calcium (mg/100g) | (ICP-OES) | Based on AOAC 22nd Edt. 2023 | 0.2 mg/100 g |
| Tannin (%/wt) | By UV-Vis Spectrophotometer | Based on ISO-9648 | 0.1% |
| Aflatoxin (µg/kg) | LCMS/MS | AOAC 991.31 | 1 µg/kg / 0.25 µg/kg |
